# Supplementary material
Source: ML conference proceedings conference paper supplement (https://www.ecva.net/papers/eccv_2020/papers_ECCV/html/123580205_ECCV_2020_paper.php)
Supplement: Supplementary file 2 [file 123580205-supp.zip]

Archive with 11 entries (9 files):
- 1829-supp/
- 1829-supp/1829-supp-camera-ready.aux
- 1829-supp/1829-supp-camera-ready.bbl
- 1829-supp/1829-supp-camera-ready.tex
- 1829-supp/1829-supp.pdf
- 1829-supp/figures/
- 1829-supp/figures/lip & ciph.png
- 1829-supp/figures/MHP_structure.png
- 1829-supp/figures/PPP_structure.png
- 1829-supp/figures/structure.png
- 1829-supp/llncs.cls
