# Supplementary material
Source: ML conference proceedings conference paper supplement (https://www.ecva.net/papers/eccv_2020/papers_ECCV/html/123580205_ECCV_2020_paper.php)
Supplement: Supplementary file 2 [file 123580205-supp.zip › 1829-supp/1829-supp-camera-ready.aux]

\relax 
\citation{DBLP:journals/pami/LiangGSL19}
\citation{DBLP:conf/eccv/GongLLCYL18}
\citation{DBLP:journals/pami/LiangGSL19}
\citation{DBLP:conf/eccv/GongLLCYL18}
\citation{DBLP:journals/pami/LiangGSL19}
\citation{DBLP:conf/eccv/GongLLCYL18}
\citation{DBLP:journals/pami/LiangGSL19}
\citation{DBLP:conf/eccv/GongLLCYL18}
\citation{DBLP:conf/cvpr/ChenMLFUY14}
\citation{DBLP:journals/ijcv/EveringhamGWWZ10}
\citation{DBLP:conf/cvpr/ChenMLFUY14}
\citation{DBLP:conf/cvpr/ChenMLFUY14}
\citation{DBLP:conf/mm/ZhaoLCSYF18}
\@writefile{toc}{\contentsline {title}{Learning Semantic Neural Tree for \unskip \ \ignorespaces Human Parsing Supplementary Material}{1}\protected@file@percent }
\@writefile{toc}{\authcount {8}}
\@writefile{toc}{\contentsline {author}{Ruyi Ji \and Dawei Du \and Libo Zhang \unskip {}\and Longyin Wen \and \unskip \ \ignorespaces  Yanjun Wu \and Chen Zhao \and Feiyue Huang \and Siwei Lyu }{1}\protected@file@percent }
\@writefile{toc}{\contentsline {section}{\numberline {1}The Category Label Definition in the LIP and CIHP Datasets}{1}\protected@file@percent }
\@writefile{lot}{\contentsline {table}{\numberline {1}{\ignorespaces The category label definition used in the LIP \cite  {DBLP:journals/pami/LiangGSL19} and CIHP \cite  {DBLP:conf/eccv/GongLLCYL18} datasets.}}{1}\protected@file@percent }
\newlabel{tab:lip_label}{{1}{1}}
\@writefile{toc}{\contentsline {section}{\numberline {2}The Architecture of Our Semantic Neural Tree in the Pascal-Person-Part Dataset}{1}\protected@file@percent }
\citation{DBLP:conf/mm/ZhaoLCSYF18}
\bibstyle{splncs04}
\bibdata{references}
\bibcite{DBLP:conf/cvpr/ChenMLFUY14}{1}
\bibcite{DBLP:journals/ijcv/EveringhamGWWZ10}{2}
\@writefile{lof}{\contentsline {figure}{\numberline {1}{\ignorespaces The architecture of our semantic neural tree used in the LIP \cite  {DBLP:journals/pami/LiangGSL19} and CIHP \cite  {DBLP:conf/eccv/GongLLCYL18} datasets.}}{2}\protected@file@percent }
\newlabel{fig:lip_structure}{{1}{2}}
\@writefile{lot}{\contentsline {table}{\numberline {2}{\ignorespaces The category label definition used in the Pascal-Person-Part dataset.}}{2}\protected@file@percent }
\newlabel{tab:ppp_label}{{2}{2}}
\@writefile{toc}{\contentsline {section}{\numberline {3}The Architecture of Our Semantic Neural Tree in the MHP-v2 Dataset}{2}\protected@file@percent }
\bibcite{DBLP:conf/eccv/GongLLCYL18}{3}
\bibcite{DBLP:journals/pami/LiangGSL19}{4}
\bibcite{DBLP:conf/mm/ZhaoLCSYF18}{5}
\@writefile{lof}{\contentsline {figure}{\numberline {2}{\ignorespaces The architecture of our semantic neural tree used in the Pascal-Person-Part dataset \cite  {DBLP:conf/cvpr/ChenMLFUY14}.}}{4}\protected@file@percent }
\newlabel{fig:ppp_structure}{{2}{4}}
\@writefile{lot}{\contentsline {table}{\numberline {3}{\ignorespaces The category label definition used in the MHP-v2 dataset.}}{4}\protected@file@percent }
\newlabel{tab:mhp_label}{{3}{4}}
\@writefile{lof}{\contentsline {figure}{\numberline {3}{\ignorespaces he architecture of our semantic neural tree used in the MHP-v2 dataset \cite  {DBLP:conf/mm/ZhaoLCSYF18}.}}{5}\protected@file@percent }
\newlabel{fig:mhp_structure}{{3}{5}}
