# Supplementary material
Source: ML conference proceedings conference paper supplement (https://www.ecva.net/papers/eccv_2020/papers_ECCV/html/123580205_ECCV_2020_paper.php)
Supplement: Supplementary file 2 [file 123580205-supp.zip › 1829-supp/1829-supp-camera-ready.bbl]

\begin{thebibliography}{1}
\providecommand{\url}[1]{\texttt{#1}}
\providecommand{\urlprefix}{URL }
\providecommand{\doi}[1]{https://doi.org/#1}

\bibitem{DBLP:conf/cvpr/ChenMLFUY14}
Chen, X., Mottaghi, R., Liu, X., Fidler, S., Urtasun, R., Yuille, A.L.: Detect
  what you can: Detecting and representing objects using holistic models and
  body parts. In: CVPR. pp. 1979--1986 (2014)

\bibitem{DBLP:journals/ijcv/EveringhamGWWZ10}
Everingham, M., Gool, L.V., Williams, C.K.I., Winn, J.M., Zisserman, A.: The
  pascal visual object classes {(VOC)} challenge. IJCV  \textbf{88}(2),
  303--338 (2010)

\bibitem{DBLP:conf/eccv/GongLLCYL18}
Gong, K., Liang, X., Li, Y., Chen, Y., Yang, M., Lin, L.: Instance-level human
  parsing via part grouping network. In: ECCV. pp. 805--822 (2018)

\bibitem{DBLP:journals/pami/LiangGSL19}
Liang, X., Gong, K., Shen, X., Lin, L.: Look into person: Joint body parsing
  {\&} pose estimation network and a new benchmark. TPAMI  \textbf{41}(4),
  871--885 (2019)

\bibitem{DBLP:conf/mm/ZhaoLCSYF18}
Zhao, J., Li, J., Cheng, Y., Sim, T., Yan, S., Feng, J.: Understanding humans
  in crowded scenes: Deep nested adversarial learning and {A} new benchmark for
  multi-human parsing. In: ACM MM. pp. 792--800 (2018)

\end{thebibliography}
