# Supplementary material
Source: ML conference proceedings conference paper supplement (https://www.ecva.net/papers/eccv_2020/papers_ECCV/html/123580205_ECCV_2020_paper.php)
Supplement: Supplementary file 2 [file 123580205-supp.zip › 1829-supp/1829-supp-camera-ready.tex]

% updated April 2002 by Antje Endemann
% Based on CVPR 07 and LNCS, with modifications by DAF, AZ and elle, 2008 and AA, 2010, and CC, 2011; TT, 2014; AAS, 2016; AAS, 2020

\documentclass[runningheads]{llncs}
\usepackage{graphicx}
\usepackage{comment}
\usepackage{amsmath,amssymb} % define this before the line numbering.
\usepackage{color}
\usepackage{epsfig}
\usepackage{amsmath}
\usepackage{amssymb}
\usepackage{booktabs}
\usepackage{mdwlist}
\usepackage{cases}
\usepackage{url}

\def\ie{{\em i.e.}}
\def\eg{{\em e.g.}}
\def\etal{{\em et al.}}

% INITIAL SUBMISSION - The following two lines are NOT commented
% CAMERA READY - Comment OUT the following two lines
%\usepackage{ruler}
%\usepackage[width=122mm,left=12mm,paperwidth=146mm,height=193mm,top=12mm,paperheight=217mm]{geometry}


\begin{document}
% \renewcommand\thelinenumber{\color[rgb]{0.2,0.5,0.8}\normalfont\sffamily\scriptsize\arabic{linenumber}\color[rgb]{0,0,0}}
% \renewcommand\makeLineNumber {\hss\thelinenumber\ \hspace{6mm} \rlap{\hskip\textwidth\ \hspace{6.5mm}\thelinenumber}}
% \linenumbers
\pagestyle{headings}
\mainmatter
\def\ECCVSubNumber{1829}  % Insert your submission number here

\title{Learning Semantic Neural Tree for \\Human Parsing Supplementary Material} % Replace with your title


% INITIAL SUBMISSION 
\begin{comment}
\titlerunning{ECCV-20 submission ID \ECCVSubNumber} 
\authorrunning{ECCV-20 submission ID \ECCVSubNumber} 
\author{Anonymous ECCV submission}
\institute{Paper ID \ECCVSubNumber}
\end{comment}
%******************

% CAMERA READY SUBMISSION
%\begin{comment}
\titlerunning{Learning Semantic Neural Tree for Human Parsing}
% If the paper title is too long for the running head, you can set
% an abbreviated paper title here
%
\author{Ruyi Ji\inst{1,2} \and
Dawei Du\inst{3} \and
Libo Zhang\inst{1,} \thanks{Libo Zhang is the corresponding author(libo@iscas.ac.cn).}\and
Longyin Wen\inst{4} \and \\
Yanjun Wu\inst{1} \and
Chen Zhao\inst{1} \and
Feiyue Huang\inst{5} \and
Siwei Lyu\inst{3} 
}
%
\authorrunning{Ji \etal}
% First names are abbreviated in the running head.
% If there are more than two authors, 'et al.' is used.
%
\institute{
Institute of Software Chinese Academy of Sciences, China,\and
University of Chinese Academy of Sciences, China,\and
University at Albany, State University of New York, USA, \and
JD Finance America Corporation, USA, \and
Tencent Youtu Lab, China.\\
%\email{\{ruyi2017, libo, yanjun, zhaochen\}@iscas.ac.cn}\\
%\email{\{ddu,slyu\}@albany.edu} \\
%\email{longyin.wen.cv@gmail.com}\\
%\email{huangfeiyue@gmail.com}   \\
}
%\end{comment}
%******************
\maketitle

%%%%%%%%% BODY TEXT
%-------------------------------------------------------------------------
\section{The Category Label Definition in the LIP and CIHP Datasets}
Since the LIP \cite{DBLP:journals/pami/LiangGSL19} and CIHP \cite{DBLP:conf/eccv/GongLLCYL18} datasets use the same annotations, we adopt the same architecture of our neural tree, shown in Figure \ref{fig:lip_structure}. We report the category label definition in our neural tree in Table \ref{tab:lip_label}.


\begin{figure*}[t]
	\centering
	\includegraphics[width=0.95\linewidth]{./figures/structure.png}
	\caption{The architecture of our semantic neural tree used in the LIP \cite{DBLP:journals/pami/LiangGSL19} and CIHP \cite{DBLP:conf/eccv/GongLLCYL18} datasets.}
	\label{fig:lip_structure}
\end{figure*}

\begin{table}[h]  
	%\setlength{\tabcolsep} 
	\caption{The category label definition used in the LIP \cite{DBLP:journals/pami/LiangGSL19} and CIHP \cite{DBLP:conf/eccv/GongLLCYL18} datasets.}  
	\label{tab:lip_label}
	\begin{center}  
		\begin{tabular}{|c|c|}
			\hline
			 Leaf   &                    Label                    \\ \hline
			$L^1_1$ &                 Background                  \\ \hline
			$L^2_1$ &         Hat, Hair, Sunglasses, Face         \\ \hline
			$L^3_1$ &      Scarf, Upper-clothes, Coat, Dress      \\ \hline
			$L^3_2$ &         Left-arm, Right-arm, Glove          \\ \hline
			$L^3_3$ & Skirt, Pants, Jumpsuit, Left-leg, Right-leg \\ \hline
			$L^3_4$ &        Socks, Left-shoe, Right-shoe         \\ \hline
		\end{tabular}  
	\end{center}  
\end{table}

\section{The Architecture of Our Semantic Neural Tree in the Pascal-Person-Part Dataset}
The PASCAL-Person-Part dataset \cite{DBLP:conf/cvpr/ChenMLFUY14} is originally from the PASCAL VOC-2010 dataset \cite{DBLP:journals/ijcv/EveringhamGWWZ10}, and is extended for human parsing with $6$ coarse body part labels (\ie, \textit{head}, \textit{torso}, \textit{upper-/lower-arms}, and \textit{upper-/lower-legs}). As shown in Figure \ref{fig:ppp_structure}, we construct a neural tree with $3$-level. We summarize the category label definition in Table \ref{tab:ppp_label}.


\begin{figure*}[b]
	\centering
	\includegraphics[width=0.95\linewidth]{./figures/PPP_structure.png}
	\caption{The architecture of our semantic neural tree used in the Pascal-Person-Part dataset \cite{DBLP:conf/cvpr/ChenMLFUY14}.}
	\label{fig:ppp_structure}
\end{figure*}

\begin{table}[h]  
	%\setlength{\tabcolsep}{1.5pt}  
	\caption{The category label definition used in the Pascal-Person-Part dataset.}  
	\label{tab:ppp_label}
	\begin{center}  
		\begin{tabular}{|c|c|}
			\hline
			 Leaf   &   Label    \\ \hline
			$L^1_1$ & Background \\ \hline
			$L^2_1$ &    Head    \\ \hline
			$L^3_1$ &   Torso    \\ \hline
			$L^3_2$ &   U-arms   \\ \hline
			$L^3_3$ &   L-arms   \\ \hline
			$L^3_4$ &   U-legs   \\ \hline
			$L^3_5$ &   L-legs   \\ \hline
		\end{tabular}  
	\end{center}  
\end{table}


\section{The Architecture of Our Semantic Neural Tree in the MHP-v2 Dataset}
The MHP-v2 dataset \cite{DBLP:conf/mm/ZhaoLCSYF18} includes $25,403$ elaborately annotated images with $58$ fine-grained semantic category labels, involving $2\sim26$ persons per image and captured in real-world scenes from various viewpoints, poses, occlusion, interactions and background. As shown in Figure \ref{fig:mhp_structure}, we construct a neural tree with $5$-level. We summarize the category label definition in Table \ref{tab:mhp_label}.

\begin{figure*}[b]
	\centering
	\includegraphics[width=0.95\linewidth]{./figures/MHP_structure.png}
	\caption{he architecture of our semantic neural tree used in the MHP-v2 dataset \cite{DBLP:conf/mm/ZhaoLCSYF18}.}
	\label{fig:mhp_structure}
\end{figure*}

\begin{table}[hb]  
	\setlength{\tabcolsep}{0.5pt}  
	\caption{The category label definition used in the MHP-v2 dataset.}  
	\label{tab:mhp_label}	
	\footnotesize
	\begin{center}  
		\begin{tabular}{|c|c|}
			\hline
			 Leaf   &                                Label                                \\ \hline
			$L^1_1$ &                             Background                              \\ \hline
			$L^2_1$ &      Backpack, Protector, Ball, Bats, Bottle, Carrybag, Cases,      \\
			        &                       Umbrella, Wallet/Purse                        \\ \hline
			$L^3_1$ & Other-full-body-clothes, Other-accessary, Other-upper-body-clothes, \\
			        &                      Other-lower-body-clothes                       \\ \hline
			$L^4_1$ &     Cap/Hat, Helmet, Hair, Sunglasses, Face, Headwear, Eyewear      \\ \hline
			$L^5_1$ &    Bikini/Bra, Jacket/Windbreaker/Hoodie, Tee-shirt, Polo-shirt,    \\
			        &  Sweater, Singlet, Torso-skin, Robe, Coat, Dress, Tie, Scarf, Belt  \\ \hline
			$L^5_2$ & Glove, Watch, Wristband, Left-arm, Right-arm, Left-hand, Right-hand \\ \hline
			$L^5_3$ &   Left-leg, Right-leg, Jumpsuit, Pants, Shorts/Swim-shorts, Skirt   \\ \hline
			$L^5_4$ &   Stockings, Socks, Left-boot, Right-boot, Left-shoe, Right-shoe    \\
			        & Left-higheel, Right-higheel, Left-sandal, Right-sandal, Left-foot,  \\
			        &                             Right-foot                              \\ \hline
		\end{tabular}  
	\end{center}  
\end{table}

%\bibliographystyle{splncs04}
%\bibliography{references}
\input{1829-supp-camera-ready.bbl}
\end{document}
