# Supplementary material
Source: ML conference proceedings conference paper supplement (https://www.ecva.net/papers/eccv_2020/papers_ECCV/html/123580205_ECCV_2020_paper.php)

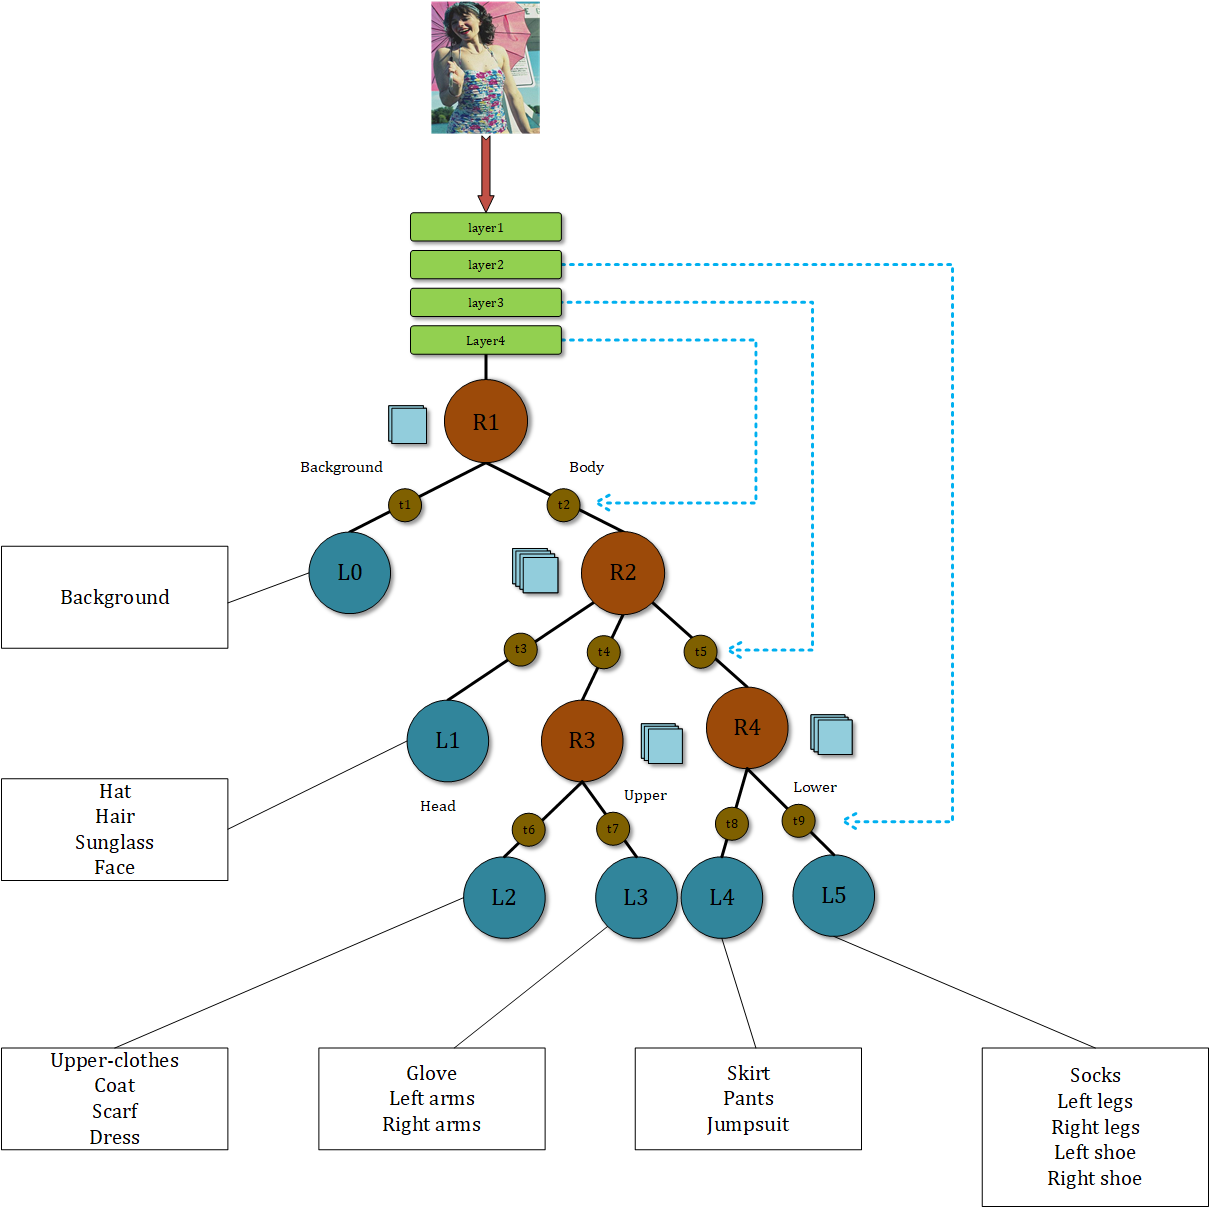

Supplement: Supplementary file 2 [file 123580205-supp.zip › 1829-supp/figures/lip & ciph.png]

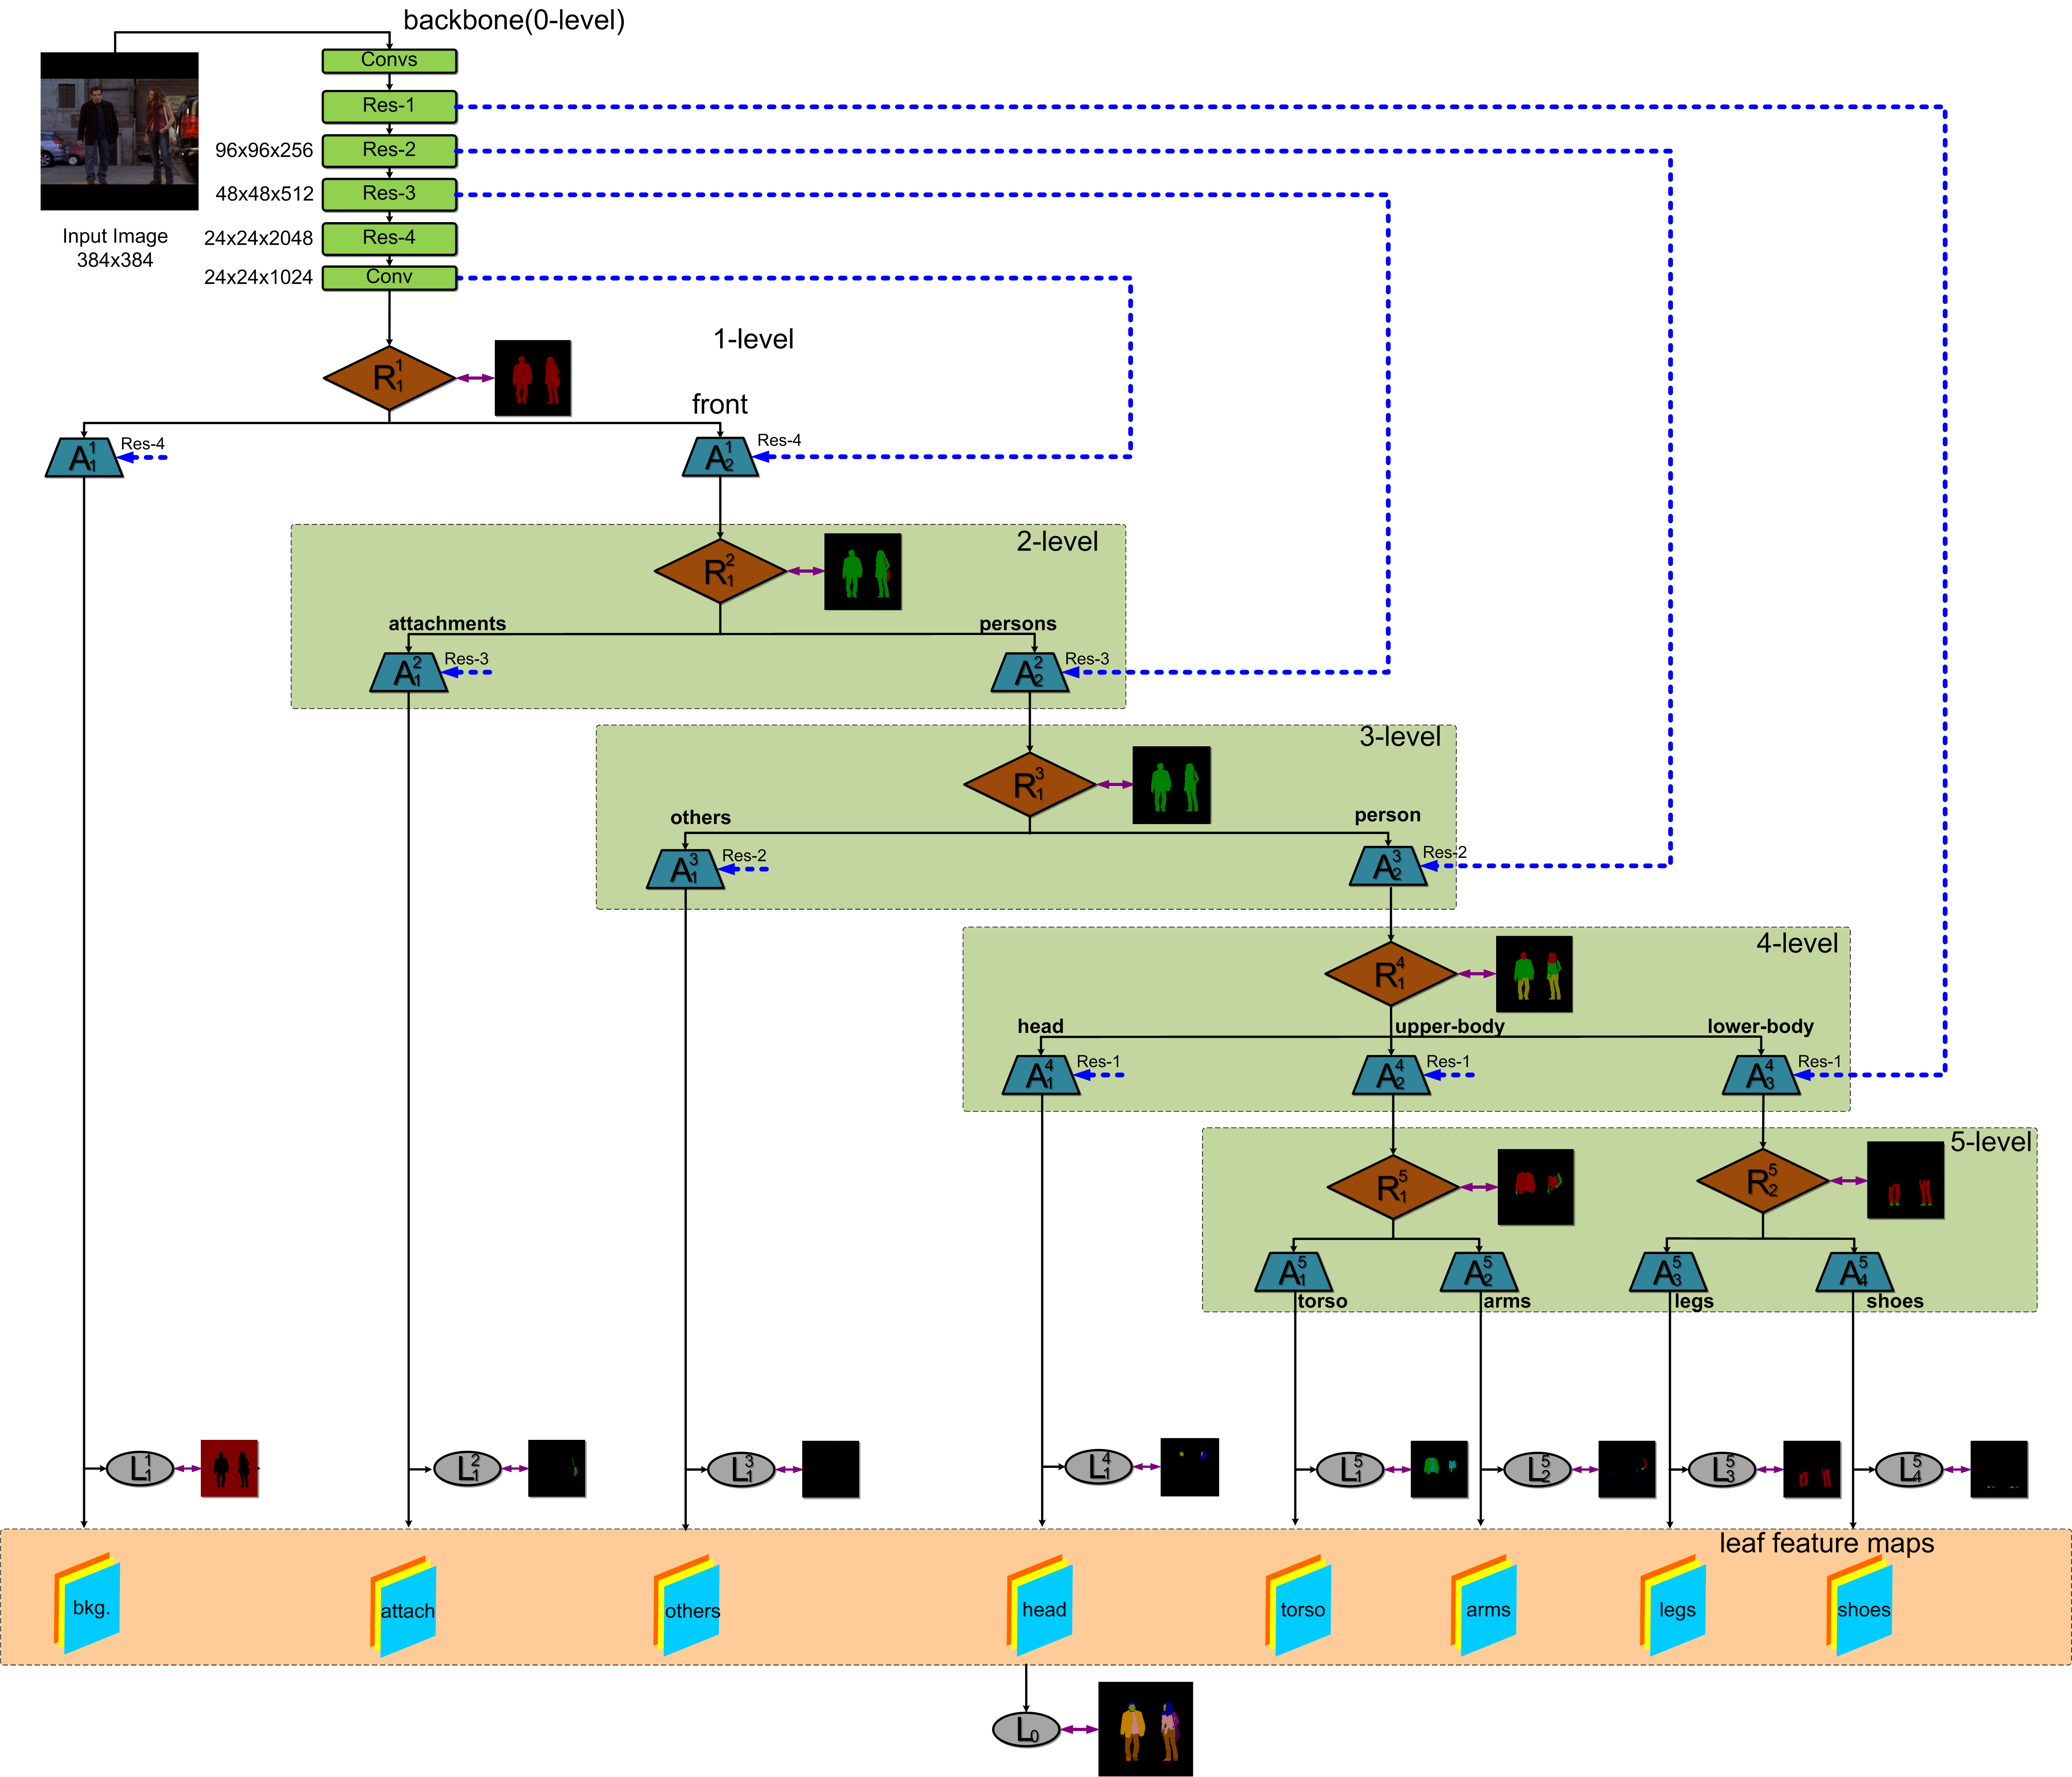

Supplement: Supplementary file 2 [file 123580205-supp.zip › 1829-supp/figures/MHP_structure.png]

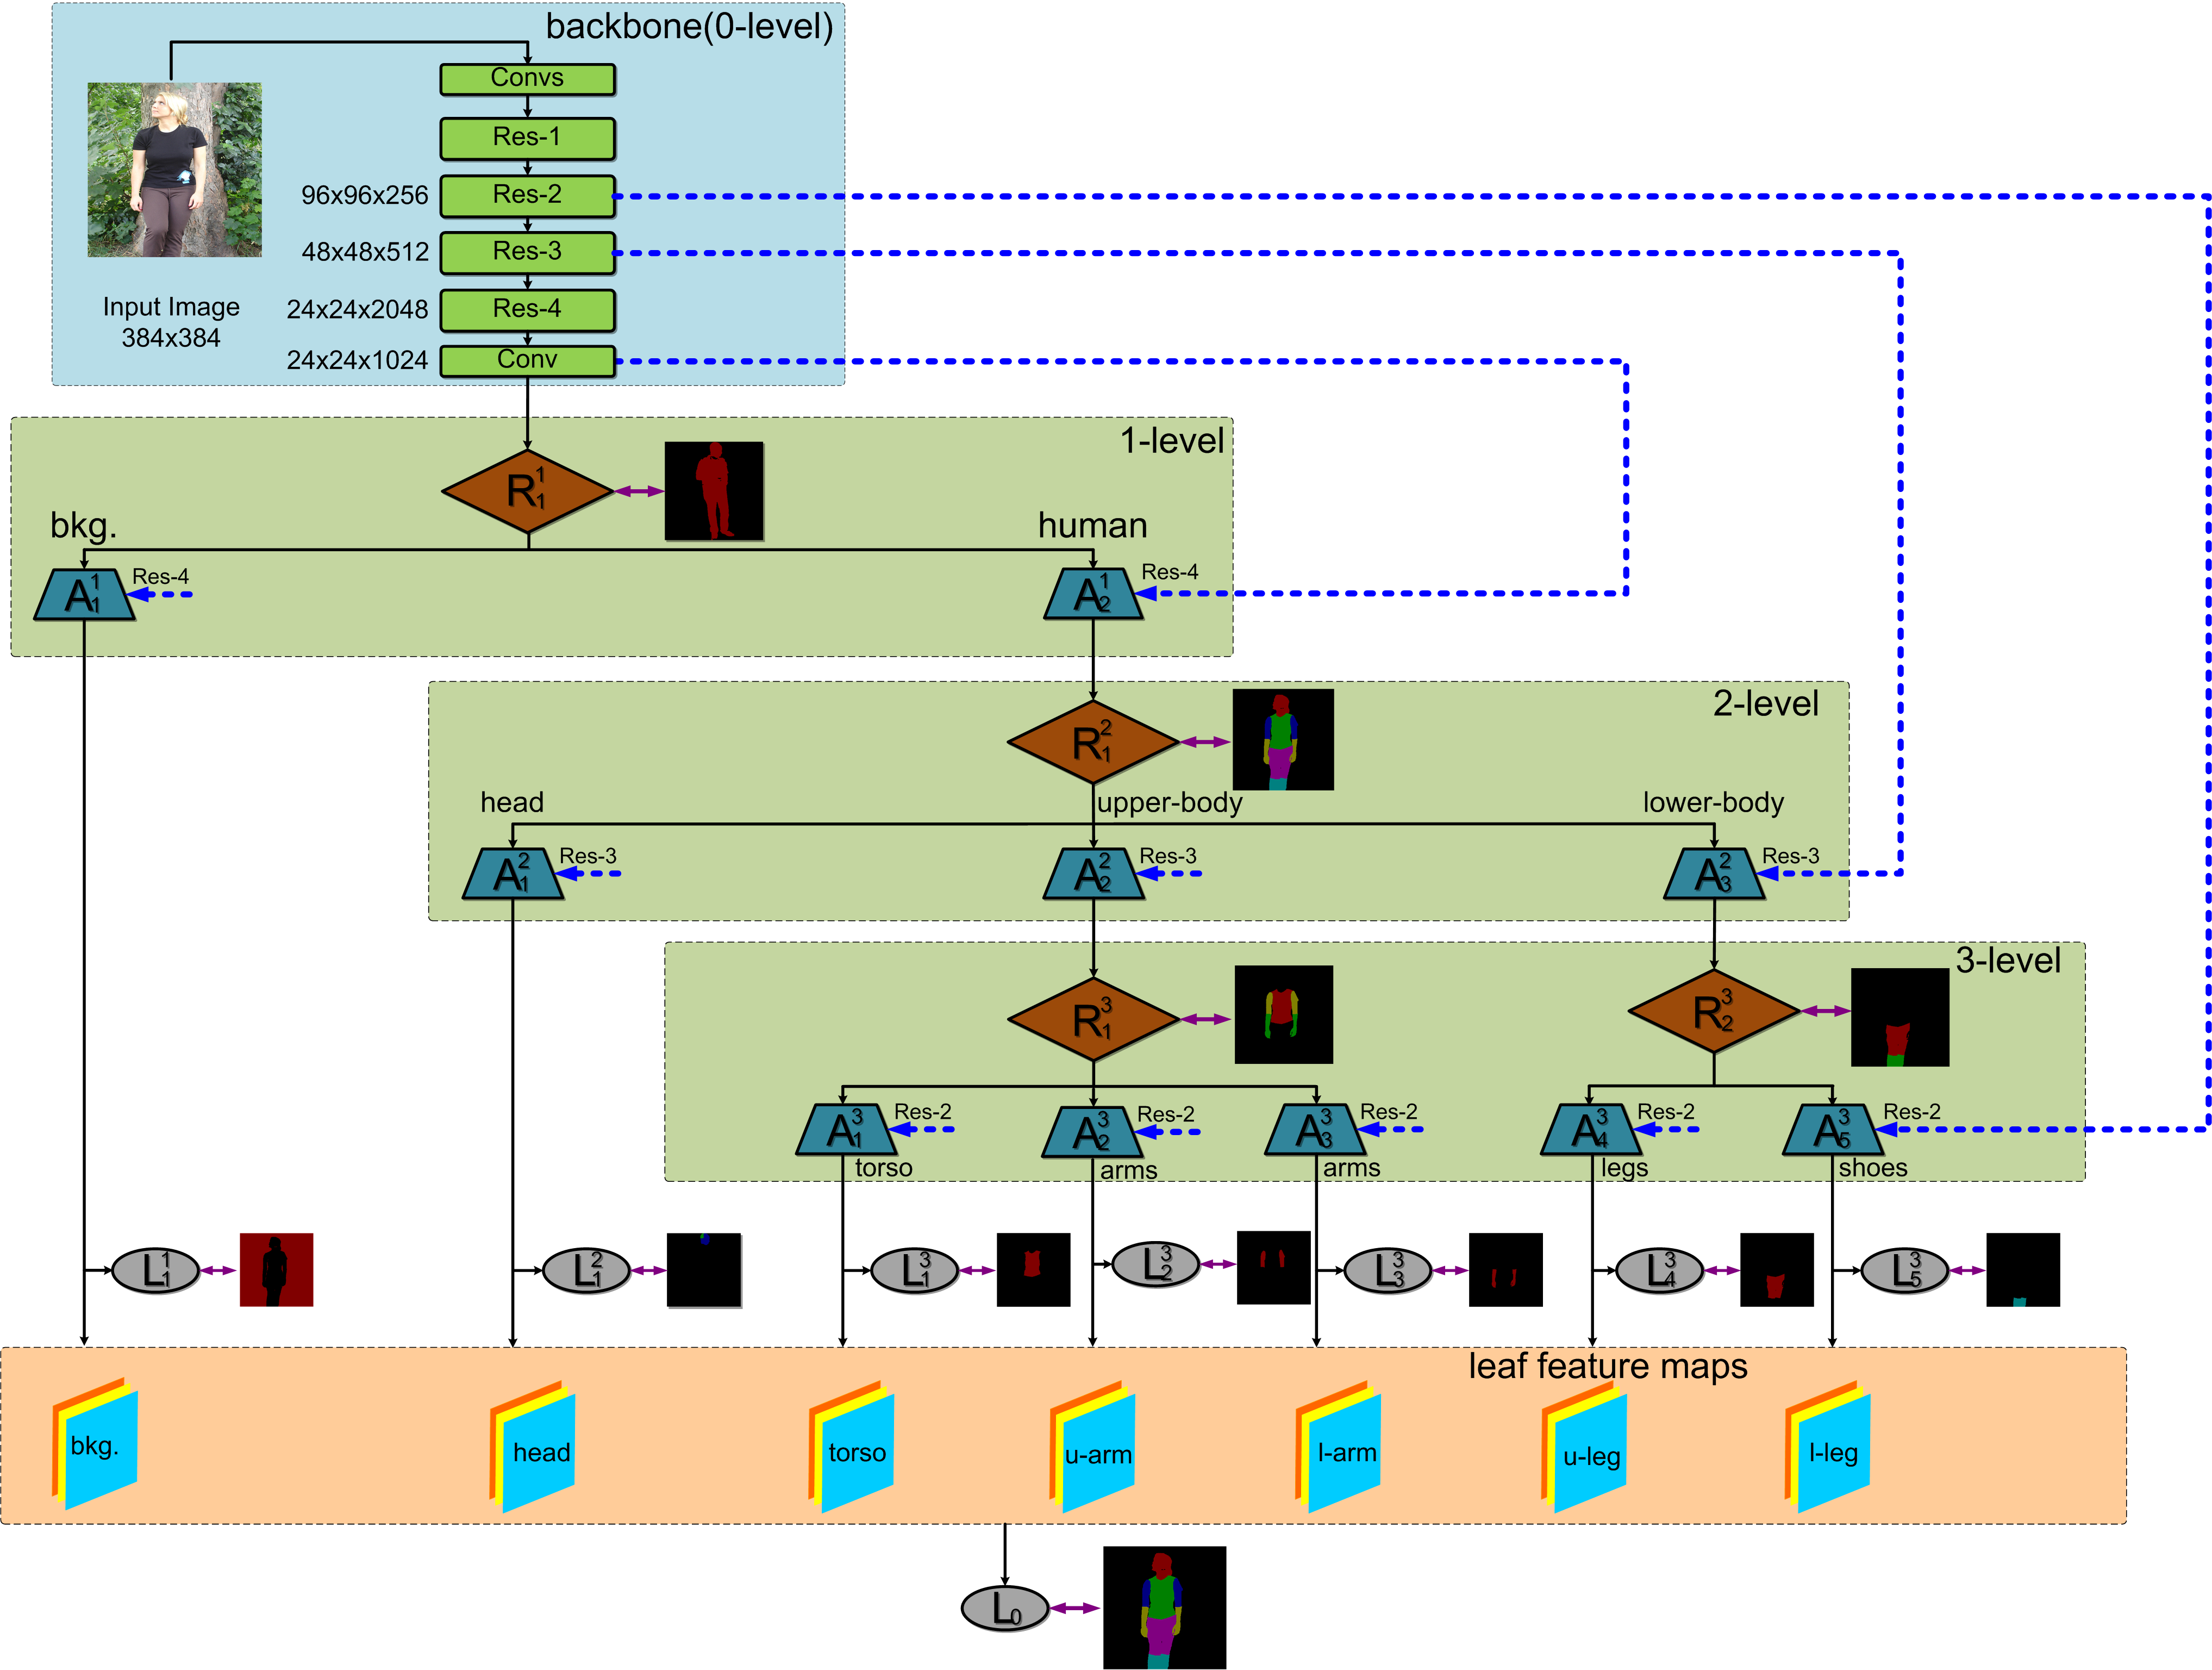

Supplement: Supplementary file 2 [file 123580205-supp.zip › 1829-supp/figures/PPP_structure.png]

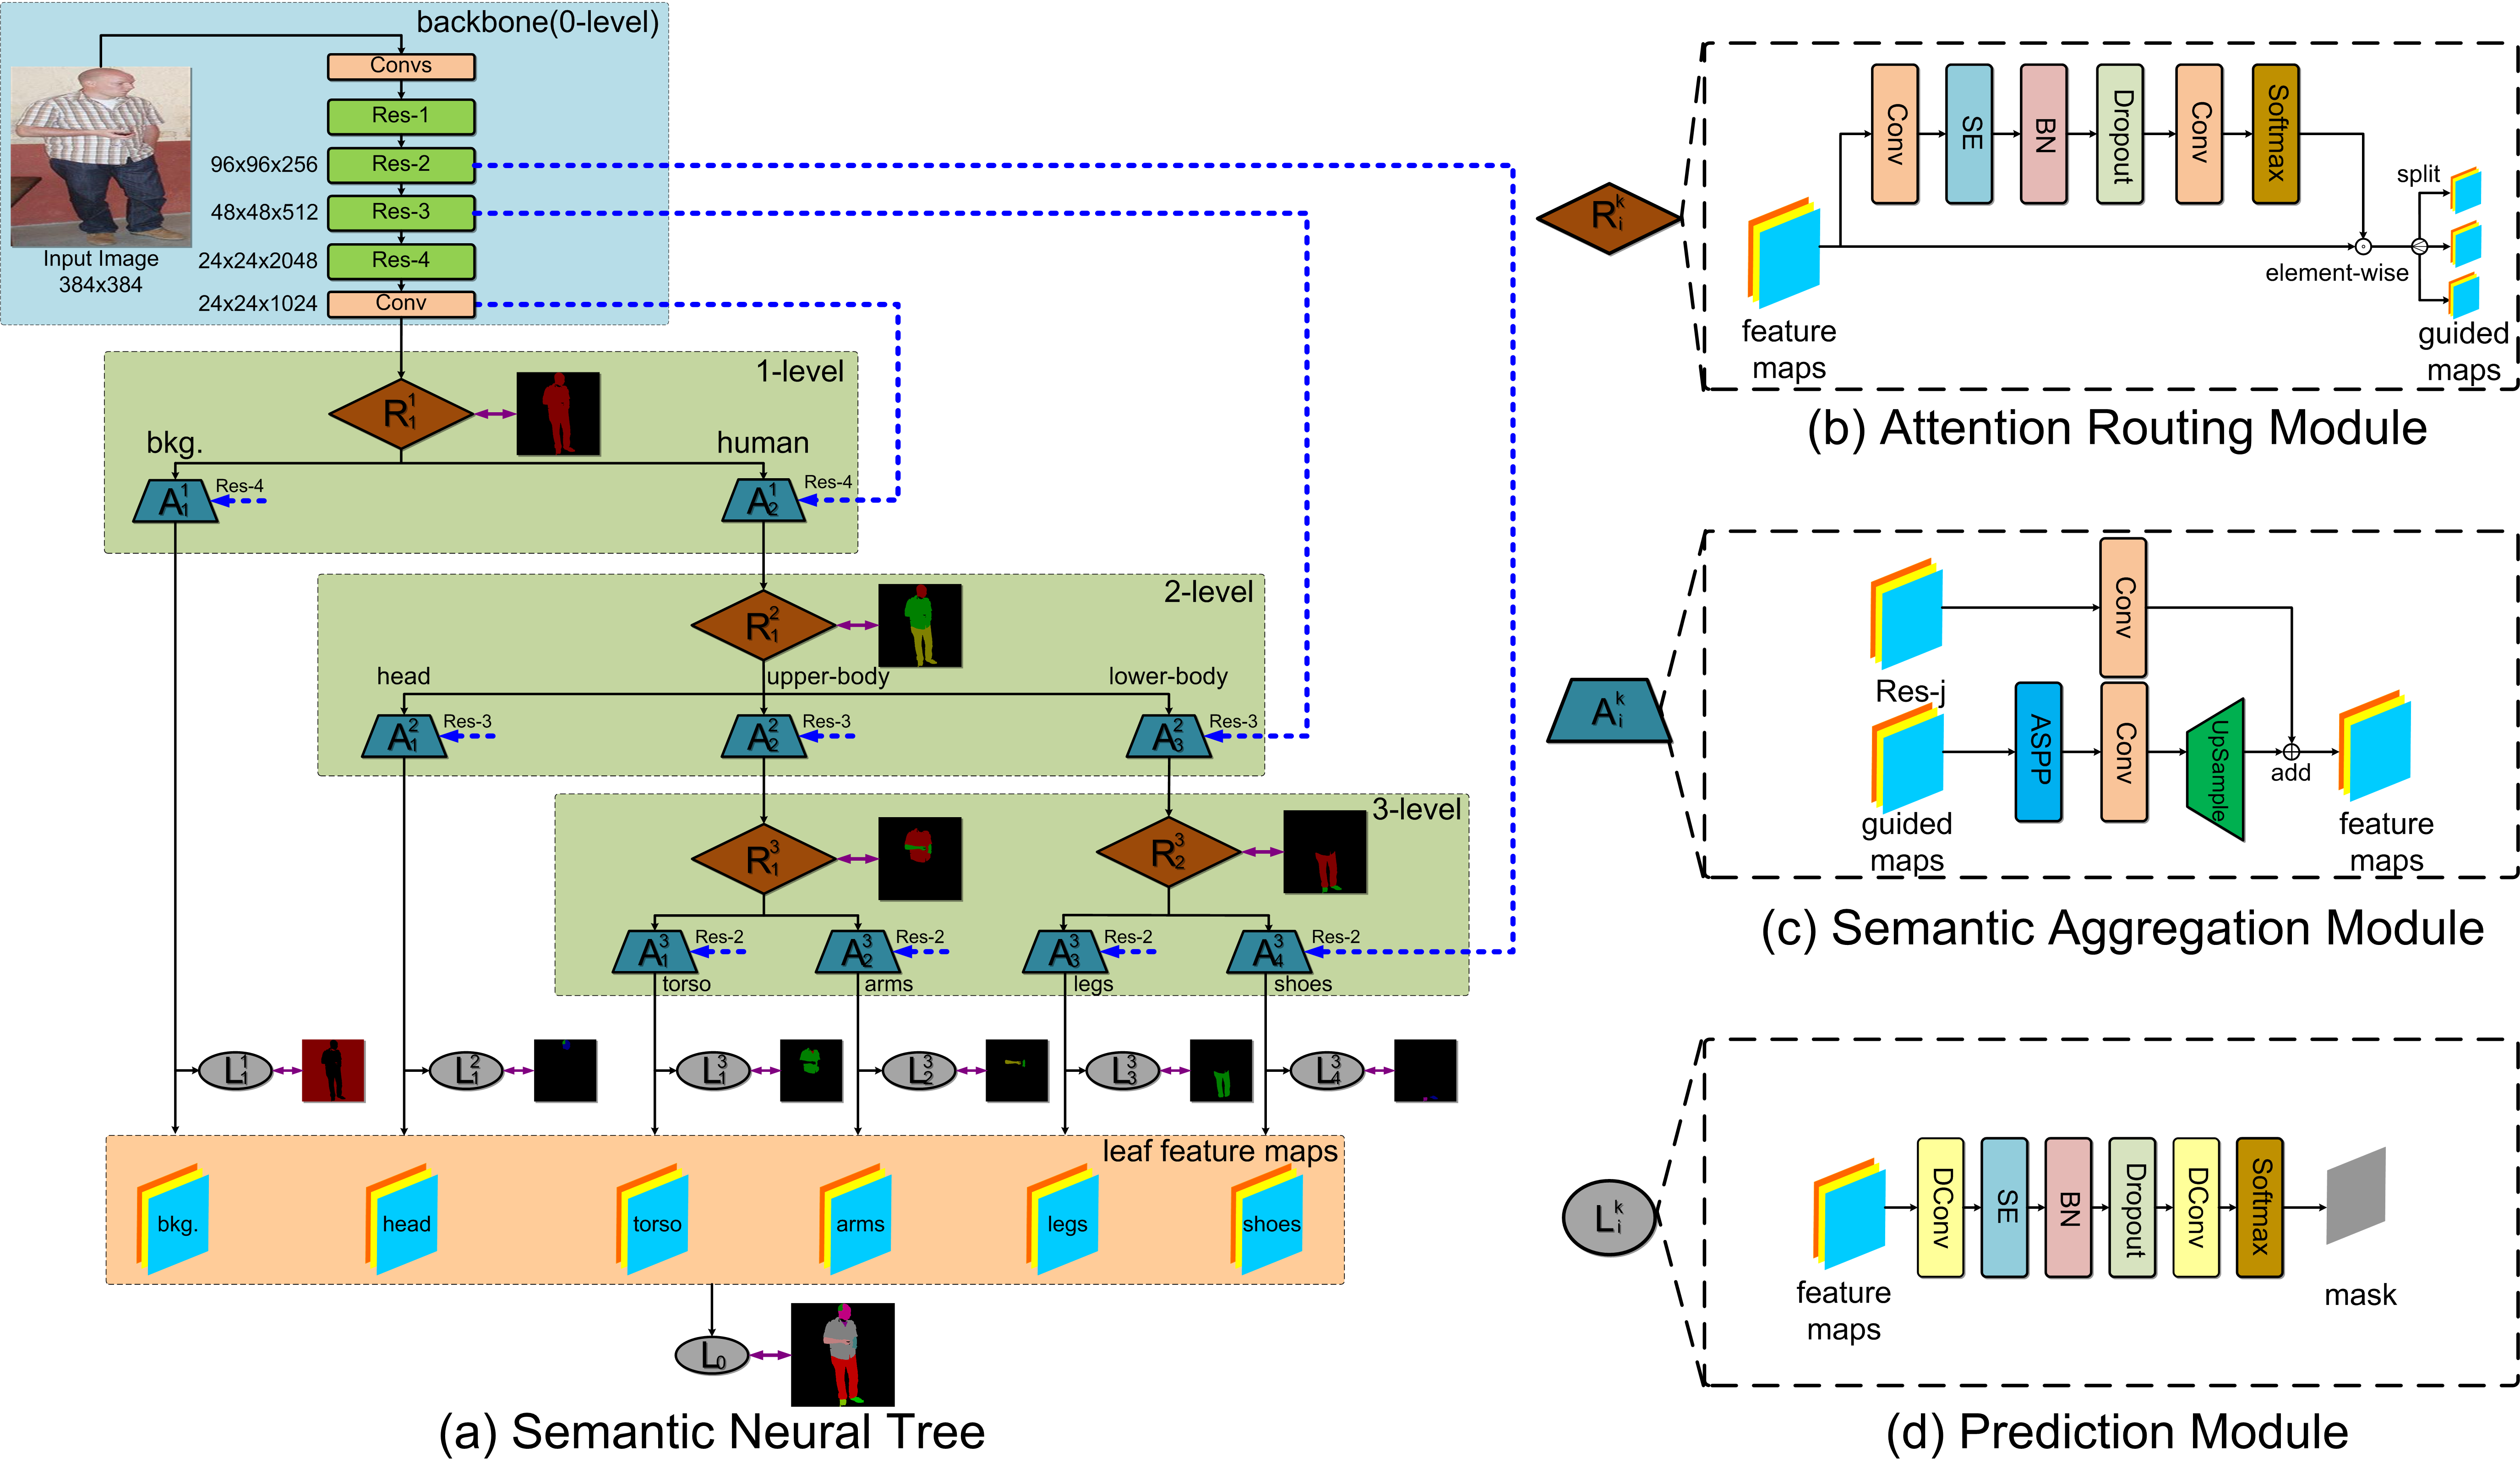

Supplement: Supplementary file 2 [file 123580205-supp.zip › 1829-supp/figures/structure.png]
